# Supplementary material
Source: publisher figshare collection journal article supplement (https://tandf.figshare.com/articles/dataset/_/5882227)
Supplement: Supplementary file 1 [file 1]

## **EVALUATION OF THE SIMULATION AND FINAL SCENARIO:**

### **Movements (Finnish maneuver):**

1      2      3      4      5

*1 No placement of the hands. / 2 Abnormal placement. / 3 Partially Correct placement.  
4 Placement almost correct; hands trembling /5 Correct placement and fluid assistance.*

### **Respect:**

1      2      3      4      5

*1 Not even introduce him/herself. / 2 Introduce him/herself. / 3 Introduce him/herself and uses patient's name. / 4 Introduce him/herself, uses the patient's name, involves the companion OR asks the baby's name. / 5 Introduce him/herself, uses the patient's name, involves the companion AND asks the baby's name.*

### **Infection prevention practices:**

1      2      3      4      5

*1 Does not wear gloves. / 2 Uses gloves. / 3 Wear gloves, medical gown and hat. / 4 Handwashing, gloves, gown and hat. /5 Handwashing, gloves, gown, hat and touches only when and where necessary.*

### **Cardiotocography (CTG):**

1      2      3      4      5

*1 Does not request it or observe it. / 2 Requests it, but does not observe it. / 3 Requests, observes, but does not care. / 4 Requests, observes, interprets and acts incorrectly. / 5 Requests, observes, interprets and acts correctly.*
