# Supplementary material
Source: publisher figshare collection journal article supplement (https://tandf.figshare.com/articles/dataset/_/5882227)
Supplement: Supplementary file 2 [file 1 › EVALUATION OF THE DEBRIEFING.pdf]

## **EVALUATION OF THE DEBRIEFING:**

### **Movements (Finnish maneuver):**

1      2      3      4      5

### **Respect:**

1      2      3      4      5

### **Infection prevention practices:**

1      2      3      4      5

### **Cardiotocography (CTG):**

1      2      3      4      5

*1 No comments / no detection of mistakes / no motivation.*

*2 Detects some mistakes / do not give importance / low motivation.*

*3 Detects some mistakes / understands and feels the importance of errors / shows frustration.*

*4 Detects practically all mistakes / understands and feels the importance of errors / shows interest.*

*5 Detects practically all mistakes / understands and feels the importance of errors / highly motivated.*
